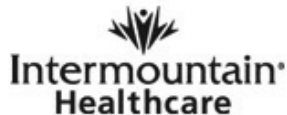

Helping People Live the Healthiest Lives Possible.

Psychiatrists (adult and child), Emergency-Access Center & Substance Use Disorder are currently needed in:

**Ogden • Provo • Salt Lake City • St. George**

-Psychiatry Medical Director opening in Provo

Employment with Intermountain Medical Group. Competitive salary with transition to production and additional income for meeting quality goals. Stipend available. Signing bonus and loan repayment available. Full Intermountain benefits to include defined pension, 401k match & CME. Relocation provided up to 15K.

For the second year in a row, Forbes magazine has named Intermountain one of the top 3 healthcare organizations, a top 25 employer overall

Contact Intermountain Physician Recruiting.  
800-888-3134 [PhysicianRecruit@imail.org](mailto:PhysicianRecruit@imail.org)  
<http://physicianjobsintermountain.org>

## Pocket Guide to Addiction Assessment and Treatment

Edited by Petros Levounis, M.D., M.A.,  
Erin Zerbo, M.D., and Rashi Aggarwal, M.D.

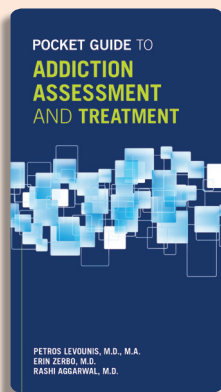

*The Pocket Guide to Addiction Assessment and Treatment* is designed specifically to aid a wide range of clinicians, regardless of their training in addiction, to more confidently assess and treat this patient population. With an accessible, easily referenced format, this book serves as a go-to resource for general psychiatrists other practitioners involved in the addiction treatment field. And because all of the diagnostic discussions are DSM-5®-based, readers can be confident that they're getting the most relevant and up-to-date guidance on the topic.

2016 • 379 pages • ISBN 978-1-58562-512-3 • Paperback  
\$65.00 • Item #62512

2016 • 379 pages • ISBN 978-1-58562-512-3 • eBook  
\$52.00 • Item #37072

AMERICAN  
PSYCHIATRIC  
ASSOCIATION  
PUBLISHING

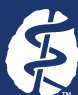

[www.appi.org](http://www.appi.org)  
Email: [appi@psych.org](mailto:appi@psych.org)  
Phone: 1-800-368-5777

AH1710A

## Psychiatrists

### Minnesota

HealthPartners is one of the Upper Midwest's leading multispecialty physician groups. We have practice opportunities for talented, caring BC/BE psychiatrists in metropolitan Minneapolis/St. Paul and central Minnesota:

#### Inpatient/Adult

- **Regions Hospital (St. Paul, MN):**  
Our state-of-the-art inpatient psychiatric facilities allow our team of psychiatrists, residents, therapists, social workers, NPs/PAs and nursing staff to provide exceptional care to adult psychiatric inpatients. Our Regions care model schedule is 7 days on/7 days off.

#### Outpatient/Adult

- **Central Minnesota (Sartell/St. Cloud)**
- **Metropolitan Minneapolis/St. Paul**

These teams provide integrated outpatient mental health services in our primary care and outpatient specialty clinics located within a variety of urban, suburban and semi-rural communities. Full-time or part-time practices are available. No hospital call responsibilities.

In addition to competitive salaries, HealthPartners offers an excellent benefits package, including an employer-matched 401(k) and 457(b), generous personal time off, malpractice insurance coverage, etc.

Let us tell you more! Please forward your CV and cover letter to:

[lori.m.fake@healthpartners.com](mailto:lori.m.fake@healthpartners.com), apply online at [healthpartners.com/careers](http://healthpartners.com/careers), or call 800-472-4695 x1. EOE

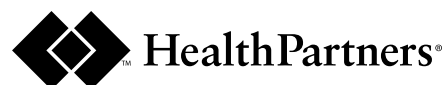

[healthpartners.com](http://healthpartners.com)

Civilian Corps

# Behavioral Health Careers

Army Medicine Civilian Corps is committed to care for military personnel, beneficiaries and their families at Army hospitals and clinics worldwide.

- » Exceptional Benefits
- » Patient Focused Care
- » Opportunities Worldwide
- » Rewarding Careers
- » Flexible Work Schedules
- » No Military Requirements

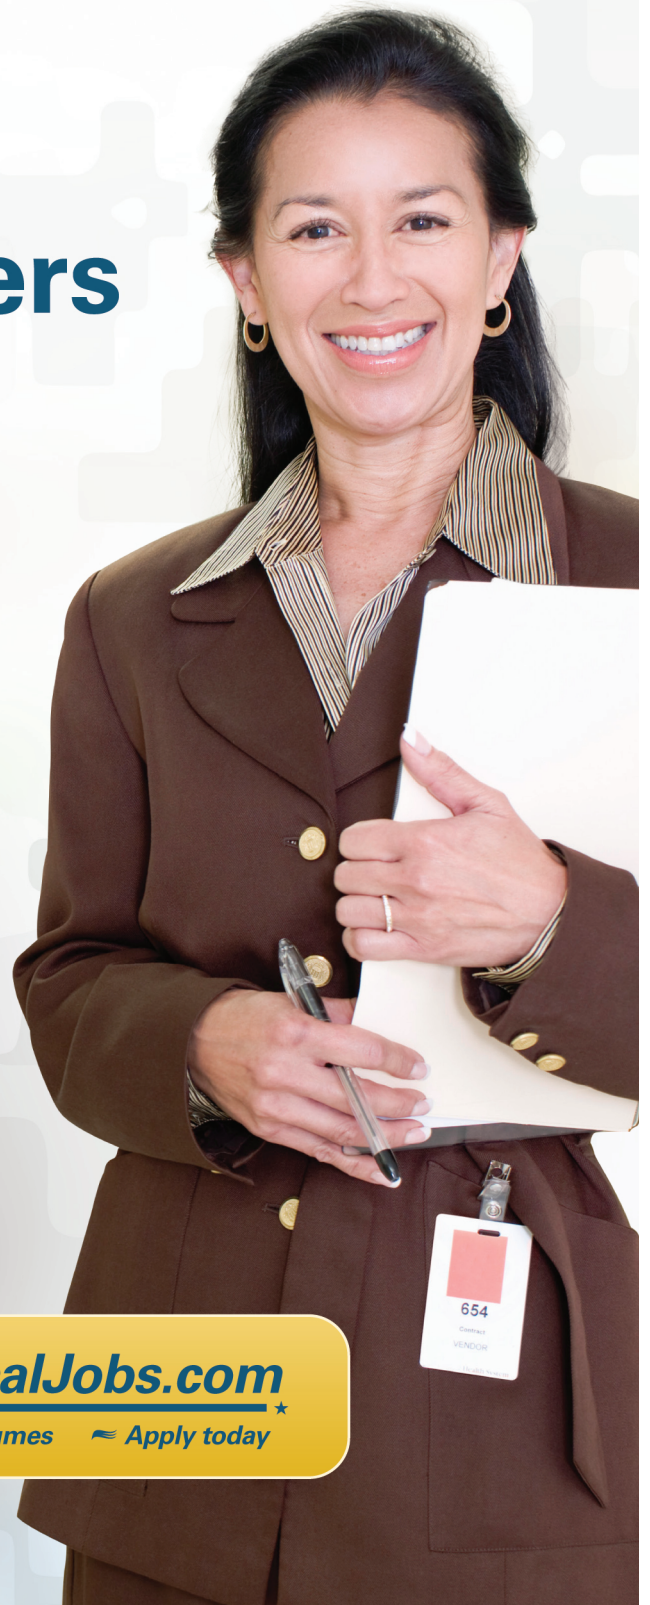

**[CivilianMedicalJobs.com](http://CivilianMedicalJobs.com)**  
≈ Find Jobs ≈ Post Resumes ≈ Apply today

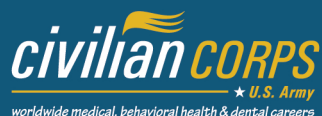

★ Vast Opportunities ★ Exceptional Benefits ★ Rewarding Careers

Army Medicine Civilian Corps employees are NOT subject to military requirements such as "boot camp," enlistments or deployments.

THE DEPARTMENT OF DEFENSE IS AN EQUAL OPPORTUNITY EMPLOYER.

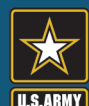

Source: http://ajp.psychiatryonline.org/doi/suppl/10.1176/ajp.2017.174.issue-2/suppl_file/back.pdf
