FEBRUARY 2017 | VOLUME 174 | NUMBER 2

# The American Journal of Psychiatry

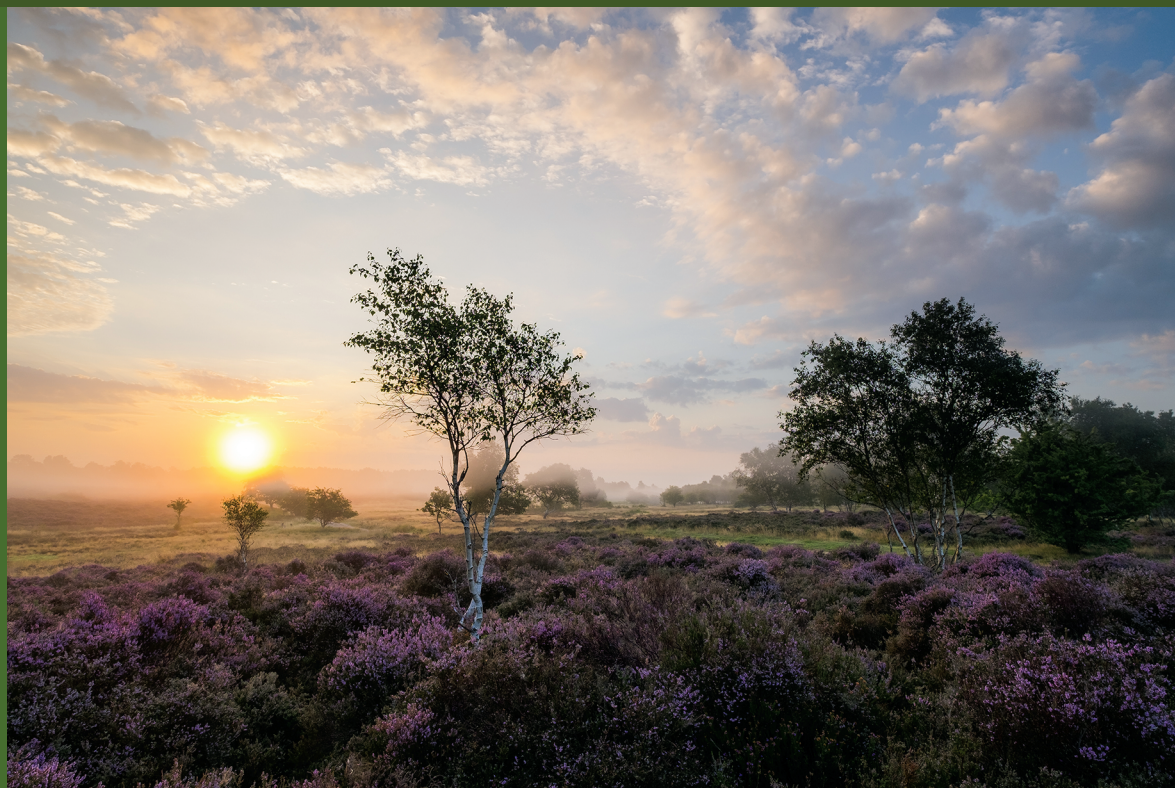

The Epidemiology of First-Episode Psychosis in Early Intervention  
in Psychosis Services: Findings From the Social Epidemiology  
of Psychoses in East Anglia [SEPEA] Study

Predicting Suicidal Behavior From Longitudinal  
Electronic Health Records

Patient Expectancy as a Mediator of Placebo Effects  
in Antidepressant Clinical Trials

AMERICAN  
PSYCHIATRIC  
ASSOCIATION

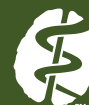

[ajp.psychiatryonline.org](http://ajp.psychiatryonline.org)
