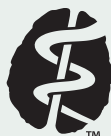

# The American Journal of Psychiatry

Official Journal of the American Psychiatric Association

## Officers 2016–2017

### President

Maria A. Oquendo, M.D., Ph.D.

### President-Elect

Anita S. Everett, M.D.

### Treasurer

Bruce J. Schwartz, M.D.

### Secretary

Altha J. Stewart, M.D.

### Assembly

#### Speaker

Daniel J. Anzia, M.D.

#### Speaker-Elect

Theresa M. Miskimen, M.D.

#### Recorder

James R. Batterson, M.D.

### Office of the CEO and Medical Director

#### CEO and Medical Director

Saul Levin, M.D., M.P.A.

### Board of Trustees

Uchenna Achebe, M.D., M.P.H.

Jeffrey Akaka, M.D.

Lama Bazzi, M.D.

R. Scott Benson, M.D.

Renée L. Binder, M.D.

Ronald M. Burd, M.D.

Stella Cai, M.D.

Jeffrey L. Geller, M.D., M.P.H.

Jeffrey A. Lieberman, M.D.

Roger Peele, M.D.

Vivian B. Pender, M.D.

Gail E. Robinson, M.D.

Paul Summergrad, M.D.

Richard F. Summers, M.D.

Melinda Young, M.D.

## Editorial Board

### Editor

Robert Freedman, M.D.

### Deputy Editors

David A. Lewis, M.D.

Robert Michels, M.D.

Daniel S. Pine, M.D.

A. John Rush, M.D.

Susan K. Schultz, M.D.

Carol A. Tamminga, M.D.

### Associate Editors

Alan Brown, M.D., M.P.H.

Tyrone Cannon, Ph.D.

Benjamin G. Druss, M.D., M.P.H.

Felton Earls, M.D.

Graham J. Emslie, M.D.

Yasmin Hurd, Ph.D.

Joan L. Luby, M.D.

Constantine G. Lyketsos, M.D., M.H.S.

Helen S. Mayberg, M.D., F.R.C.P.C.

Terrie E. Moffitt, Ph.D.

Rajesh Narendran, M.D.

Roy Perlis, M.D.

Anita Thapar, M.B.B.Ch., F.R.C.Psych.,

Ph.D., F.Med.Sci.

Mauricio Tohen, M.D., Dr.PH., M.B.A.

Eduard Vieta, M.D., Ph.D.

Katherine L. Wisner, M.D., M.S.

Xin Yu, M.D.

### Editor Emerita

Nancy C. Andreasen, M.D., Ph.D.

### Former Editors

Amariah Brigham, M.D., 1844–1849

T. Romeyn Beck, M.D., 1849–1854

John P. Gray, M.D., 1854–1886

G. Alder Blumer, M.D., 1886–1894

Richard Dewey, M.D., 1894–1897

Henry M. Hurd, M.D., 1897–1904

Edward N. Brush, M.D., 1904–1931

Clarence B. Farrar, M.D., 1931–1965

Francis J. Braceland, M.D., 1965–1978

John C. Nemiah, M.D., 1978–1993

### Editorial Staff

#### Executive Editor

Michael D. Roy

#### Senior Editors

John J. Guardiano, Ph.D.

Jane Weaver

#### Production Manager

Susan Westrate

#### Assistant Editor

Angela Moore

#### Online Content Manager

Michael Pogachar

#### Editorial Support Services Manager

Heidi Koch

#### Editorial Assistant

Linda LaCour

#### Spanish Content Manager

Sergi Casals, M.A.

#### Assistants to the Editors

Lois Lilienthal

Laura English

Rachel Hogg

Russell A. Scholl

### Publisher

Rebecca D. Rinehart

## Subscription and Business Information

*The American Journal of Psychiatry*, ISSN 0002-953X, is published monthly by the American Psychiatric Association.

The American Psychiatric Association does not hold itself responsible for statements made in its publications by contributors or advertisers. Unless so stated, material in *The American Journal of Psychiatry* does not reflect the endorsement, official attitude, or position of the American Psychiatric Association or of the Journal's Editorial Board.

Periodicals postage paid at Arlington, VA, and additional mailing offices. POSTMASTER: Send address changes to *The American Journal of Psychiatry*, Circulation Department, American Psychiatric Association, 1000 Wilson Blvd., Suite 1825, Arlington, VA 22209-3901.

### Editorial Office

*American Journal of Psychiatry*  
American Psychiatric Association  
1000 Wilson Blvd., Suite 1825  
Arlington, VA 22209-3901  
Phone: (703) 907-7885, (703) 907-7889  
E-mail: [ajp@psych.org](mailto:ajp@psych.org)

### Customer Service

Phone: (800) 368-5777 (toll-free)  
E-mail: [appi@psych.org](mailto:appi@psych.org)

### APA Member Subscription Services

Phone: (888) 35-PSYCH (toll-free)

### Subscriptions

Per year: individual \$318.00,  
international \$478.00

Institutional subscriptions are tier priced. For institutional site license or pricing information, contact (703) 907-8538 or [institutions@psych.org](mailto:institutions@psych.org).

*Additional subscription options, including single issues and student rates*

Contact Customer Service

### Advertising

*Pharmaceutical Print and Online Advertising*  
Frank Cox, Kathleen Harrison, Tim Wolfinger  
Pharmaceutical Media, Inc.  
30 East 33rd Street  
New York, NY 10016  
Phone: (212) 904-0379  
E-mail: [twolfinger@pminy.com](mailto:twolfinger@pminy.com)

*Nonpharmaceutical and Online Sales*

Eamon Wood  
Pharmaceutical Media, Inc.  
E-mail: [ewood@pminy.com](mailto:ewood@pminy.com)  
(see address and phone above).

### Permissions and Reprints

Material published in the journals of the American Psychiatric Association and American Psychiatric Association Publishing is protected by copyright and all rights are reserved. Material may not be reproduced in any form or by any means without written permission from the copyright owner. For permission to reproduce material published by APA, please visit [http://www.appi.org/Customer\\_Service/Pages/Permissions.aspx](http://www.appi.org/Customer_Service/Pages/Permissions.aspx) for more information. Permission can also be secured through the Copyright Clearance Center ([www.copyright.com](http://www.copyright.com)).

APA does not require that permission be obtained for the photocopying of isolated articles for nonprofit classroom or library reserve use; all fees associated with such permission are waived. This consent does not extend to other kinds of copying, such as copying for general distribution, for advertising or promotional purposes, for creating new collective works, or for resale. Requests for commercial distribution should be directed to (703) 907-7875.

For bulk reprints, please contact Jane Cha, (703) 907-7889; email: [jcha@psych.org](mailto:jcha@psych.org).

Indexed in Abstracts for Social Workers, Academic Abstracts, Biological Abstracts, Chemical Abstracts, Chicago Psychoanalytic Literature Index, Cumulative Index to Nursing Literature, Excerpta Medica, Hospital Literature Index, Index Medicus, International Nursing Index, Nutrition Abstracts, Psychological Abstracts, Science Citation Index, Social Science Source, and Social Sciences Index.

Pages are produced by Dartmouth Journal Services, Waterbury, VT, and printed by Dartmouth Printing Company, Hanover, NH, on acid-free paper effective with Volume 169, Number 1, January 2012.

© 2017 American Psychiatric Association.

# THE AMERICAN PSYCHIATRIC ASSOCIATION

1000 Wilson Blvd., Suite 1825, Arlington, VA 22209-3901  
(888) 357-7924 (toll-free inside the U.S. and Canada) / (703) 907-7300  
web site: [www.psychiatry.org](http://www.psychiatry.org) • e-mail: [apa@psych.org](mailto:apa@psych.org)

## Chairpersons of Councils, Committees, and Task Forces

### Standing Committees

|                             |                          |
|-----------------------------|--------------------------|
| <b>Bylaws</b>               | Edythe Harvey, M.D.      |
| <b>Elections</b>            | Barry K. Herman, M.D.    |
| <b>Ethics</b>               | Ezra Griffith, M.D.      |
| <b>Finance and Budget</b>   | Alan F. Schatzberg, M.D. |
| <i>Audit</i>                | Bruce J. Schwartz, M.D.  |
| <i>Investment Oversight</i> | David Fassler, M.D.      |
| <b>Joint Reference</b>      | Anita S. Everett, M.D.   |
| <b>Membership</b>           | Rahn K. Bailey, M.D.     |
| <b>Nominating</b>           | Renee Binder, M.D.       |
| <b>Tellers</b>              | Jose Vito, M.D.          |

### Councils

#### **Council on Addiction Psychiatry**

Frances R. Levin, M.D.

#### **Council on Advocacy and Government Relations**

Debra Pinals, M.D.

*Advocacy and Litigation Funding*

Jeffrey Akaka, M.D.

#### **Council on Children, Adolescents, and Their Families**

Joseph V. Penn, M.D.

#### **Council on Communications**

Christopher Ramsey, M.D.

#### **Council on Geriatric Psychiatry**

Robert P. Roca, M.D.

#### **Council on Healthcare Systems and Financing**

Harsh K. Trivedi, M.D.

*Reimbursement for Psychiatric Care*

Laurence Miller, M.D.

*RBRVS, Codes and Reimbursement*

Gregory G. Harris, M.D.

*Telepsychiatry*

James H. Shore, M.D.

#### **Council on International Psychiatry**

Bernardo Ng, M.D.

#### **Council on Medical Education and Lifelong Learning**

Mark H. Rapaport, M.D.

*Scientific Program*

Philip Muskin, M.D.

*Vestermark Award Committee*

Jonathan F. Borus, M.D.

#### **Council on Minority Mental Health and Health Disparities**

Christina V. Mangurian, M.D.

#### **Council on Psychiatry and Law**

Steven K. Hoge, M.D.

*Judicial Action*

Marvin S. Swartz, M.D.

#### **Council on Psychosomatic Medicine (Consultation Liaison Psychiatry)**

David F. Gitlin, M.D.

#### **Council on Quality Care**

Grayson Norquist, M.D.

*Mental Health Information Technology*

Steven Daviss, M.D.

*Performance Measures*

Karen Pierce, M.D.

*Steering Committee on Practice Guidelines*

Michael J. Vergare, M.D.

#### **Council on Research**

Dwight L. Evans, M.D.

*Psychiatric Dimensions of Disasters*

Robert J. Ursano, M.D.

# The Residents' JOURNAL

## The American Journal of Psychiatry Residents' Journal

January 2017

Volume 12

Issue 1

### Inside

- 2 Suicidal Behavior: A Distinct Psychobiology?**  
Naji C. Saitoum, M.D.  
*Examining the serotonergic system, hypothalamic pituitary adrenal axis, neuroinflammation, kynurenine pathway, and neuroplasticity, as well as interplay of biological systems.*
- 5 Supporting Residents in the Wake of Patient Suicide**  
Charles A. Whitmore, M.D., M.P.H., Jenna Cook, M.D., Lucas Salg, M.D.  
*Review of a newly-developed curriculum at the University of Colorado.*
- 8 Current Challenges in the Management of LGBT Suicide**  
Rafik Sidaros, M.D.  
*Analysis of risk factors, minority stress, and transgender issues, as well as positions on therapy and interventions.*
- 11 Suicide Rates in Cancer Patients in the Current Era in United States**  
Vivek Kumar, M.D., Neha Chaudhary, M.D., Parita Soni, M.B.B.S., Prameeta Jha, M.B.B.S.  
*Comparisons between patients and the general population.*
- 15 Suicide Prediction With Machine Learning**  
Gopalkumar Rakesh, M.D.  
*Examining use of statistical techniques that utilize complex calculations in analyzing large data sets to predict risk factors.*
- 18 Countertransference Reactions to a Suicidal Patient**  
Mary-Catherine Rensko, D.O.  
*Discussion of a case in which the resident physician's avoidance of the patient demonstrated unconscious feelings of countertransference hatred.*
- 20 Suicide by Cop: A Psychiatric Phenomenon**  
Ralph H. de Similien, M.D., M.S., M.Ed., Adamma Okorofor, M.D.  
*Analysis of statistical characteristics, sociodemographic variables, and treatment approaches.*
- 23 A Tale of Shamans, Exorcism, and Finally Suicide: A Perspective From Two Worlds**  
Nandhini Madhanagopal, M.D.  
*A resident's cultural viewpoint on suicide in India and America.*

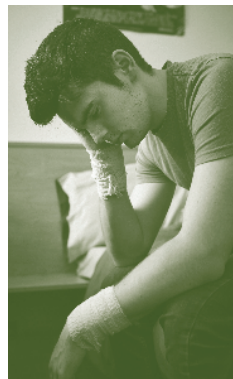

© Shutterstock.com

#### EDITOR-IN-CHIEF

Katherine Pier, M.D.

#### SENIOR DEPUTY EDITOR

Rachel Katz, M.D.

#### DEPUTY EDITOR

Oliver Glass, M.D.

#### GUEST EDITOR

Gopalkumar Rakesh, M.D.

#### ASSOCIATE EDITORS

Gopalkumar Rakesh, M.D.

Janet Charoensook, M.D.

#### MEDIA EDITOR

Michelle Liu, M.D.

#### CULTURE EDITOR

Aparna Alturu, M.D.

#### STAFF EDITOR

Angela Moore

#### EDITORS EMERITI

Rajiv Radhakrishnan, M.B.B.S., M.D.

Misty Richards, M.D., M.S.

Arshya Vahabzadeh, M.D.

Monifa Seawell, M.D.

Sarah M. Fayad, M.D.

Joseph M. Cerimele, M.D.

Molly McVoy, M.D.

Sarah B. Johnson, M.D.

**Editor-in-Chief**  
Katherine Pier, M.D.

**Senior Deputy Editor**  
Rachel Katz, M.D.

**Deputy Editor**  
Oliver Glass, M.D.

**Associate Editors**  
Gopalkumar Rakesh, M.D.  
Janet Charoensook, M.D.

*The Residents' Journal*, the largest and most robust resident-led journal in the house of medicine, is an e-publication that serves as a forum to share your ideas and experiences in training, clinical practice, research, and careers with your colleagues.

To submit a manuscript, please visit [mc.manuscriptcentral.com/appi-ajp](http://mc.manuscriptcentral.com/appi-ajp) and select a manuscript type for AJP Residents' Journal. You may submit a commentary (500 words), book review (500 words), history of psychiatry (500 words), clinical case conference (1,250 words), review article (1,500 words), treatment in psychiatry article (1,500 words), research article (1,250 words), drug review (1,500 words), or letter to the editor (250 words).

*The Residents' Journal* is sent free-of-charge to all psychiatry residents. Anyone interested in being included on the distribution list should contact Angela Moore, *The Residents' Journal* staff editor at [ajp@psych.org](mailto:ajp@psych.org) with "Subscribe to Residents' Journal" in the subject line.

To access the complete Residents' Journal archives, visit [ajp.psychiatryonline.org/residents\\_journal](http://ajp.psychiatryonline.org/residents_journal)

# Go Online

Visit [ajp.psychiatryonline.org](http://ajp.psychiatryonline.org) for these features!

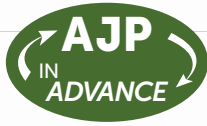

## AJP in Advance

*Discover the latest research advances before they appear in print*

### **No Association of Lower Hippocampal Volume With Alzheimer's Disease Pathology in Late-Life Depression**

Lower hippocampal volume in patients with late-life depression was not related to amyloid pathology, countering the belief that their low hippocampal volume is due to prodromal Alzheimer's disease.

### **Randomized Trial of an Integrated Behavioral Health Home: The Health Outcomes Management and Evaluation (HOME) Study**

Behavioral health homes provide higher-quality medical care for patients with serious mental illness and cardiometabolic risk factors than does usual care, but clinical outcomes are similar for the two approaches.

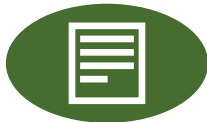

## AJP CME

*Earn CME credit: 3 courses per issue*

This month's courses appear on pages 191–194. Each short course is based on one article in this issue and can earn up to 1 *AMA PRA Category 1 Credit™*. CME credit is issued only **online**, and a paid subscription to AJP's CME course program is required.

Visit [psychiatryonline.org/cme](http://psychiatryonline.org/cme) and click on the "American Journal of Psychiatry" tab.

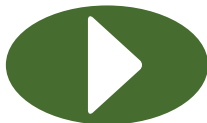

## AJP Multimedia

*Access Audio or Video for highlights of each issue*

In AJP Audio this month, Executive Editor Michael Roy discusses use of stimulants and performance enhancers as a possible risk factor for PTSD, behavioral and brain markers of overgeneralized fear conditioning in PTSD, the epidemiology of first-episode psychosis, predictors of suicidal behavior, neural predictors of initiating alcohol use during adolescence, and mediation of placebo effects by patient expectancy in antidepressant clinical trials.

In this month's video, Deputy Editor Daniel S. Pine, M.D., discusses the articles "Imaging Microglial Activation in Untreated First-Episode Psychosis: A PET Study With [<sup>18</sup>F]FEPPA" and "Neural Substrates of Overgeneralized Conditioned Fear in PTSD."

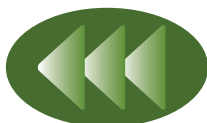

## History of Psychiatry

*Revisit the field's rich history through the pages of AJP*

### **25 years ago this month: "Is Sleep Deprivation Useful in the Treatment of Depression?"**

Sleep deprivation, properly conducted, can have rapid and dramatic antidepressant effects, although they are generally not long-lasting. Drs. Ellen Leibenluft and Thomas A. Wehr review the literature on clinical applications of sleep deprivation in the treatment of depression, including as an alternative to antidepressant medication, as a potentiator of antidepressant medication, and as a predictor of response to antidepressant medication, as well as its application as a preventive measure against recurrent mood cycles and as a diagnostic probe.

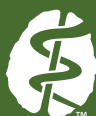

Source: https://psychiatryonline.org/doi/suppl/10.1176/ajp.2017.174.issue-2/suppl_file/front.pdf
