## PERSPECTIVAS

### EDITORIALES

- 87 **El aprendizaje en el trastorno de ansiedad generalizada no se beneficia ni de la zanahoria ni del palo**  
*Amit Etkin, M.D., Ph.D., Gregory A. Fonzo, Ph.D.*
- 89 **Cuando la adversidad social y del entorno causa esquizofrenia**  
*Susan M. Essock, Ph.D.*
- 91 **Placebo: Problemas sin resolver para la ciencia y conclusiones sencillas para la práctica clínica**  
*Michael Linden, M.D., Ph.D.*
- 93 **Aprendizaje automático e historias clínicas electrónicas: Un cambio de paradigma**  
*Daniel E. Adkins, Ph.D.*

### CONFERENCIA DE CASO CLÍNICO

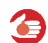

- 95 **Uso de estimulantes y potenciadores del desempeño durante y después de la exposición al trauma en un veterano de combate: Un posible factor de riesgo para los síntomas de estrés postraumático**  
*Ellen Herbst, M.D., et al.* [EMC](#) • [AUDIO](#) • [GUÍAS CLÍNICAS](#)

### IMÁGENES EN PSIQUIATRÍA

- 100 **Agnes Martin, 1912–2004**  
*Peter J. Buckley, M.D.*

### RESÚMENES Y RESEÑAS

- 102 **Kahlbaum, Hecker y Kraepelin y la transición de complejos de síntomas psiquiátricos a formas empíricas de la enfermedad**  
*Kenneth S. Kendler, M.D., Eric J. Engstrom, Ph.D.*

## NUEVAS INVESTIGACIONES

### ARTÍCULOS

- 110 **Representación de los errores de predicción en individuos con trastorno de ansiedad generalizada durante la evitación pasiva**  
*Stuart F. White, Ph.D., et al.* [EDITORIAL](#)
- 118 **Imágenes de la activación microglial en el primer episodio de psicosis no tratada: Un estudio con PET utilizando [<sup>18</sup>F]FEPPA**  
*Sina Hafizi, M.D., et al.* [VIDEO](#)
- 125 **Substratos neurales del miedo condicionado sobregeneralizado en TEPT**  
*Antonia N. Kaczurkin, Ph.D., et al.* [AUDIO](#) • [VIDEO](#)
-  135 **La expectativa de los pacientes como mediador de los efectos placebo en ensayos clínicos de antidepresivos**  
*Bret R. Rutherford, M.D., et al.* [EDITORIAL](#) • [EMC](#) • [AUDIO](#) • [GUÍAS CLÍNICAS](#)
- 143 **La epidemiología del primer episodio de psicosis en la intervención temprana en servicios de psicosis: Hallazgos del estudio de Epidemiología Social de las Psicosis en East Anglia [SEPEA]**  
*James B. Kirkbride, Ph.D., et al.* [EDITORIAL](#) • [AUDIO](#)

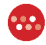

**154 Predicción del comportamiento suicida a partir de historias clínicas electrónicas longitudinales**

*Yuval Barak-Corren, M.S., et al.* EDITORIAL • EMC • AUDIO • GUÍAS CLÍNICAS

**163 Expresión alterada de los genes de la vía de señalización del complejo ARP2/3 en las células piramidales de la capa prefrontal 3 en esquizofrenia**

*Dibyadeep Datta, Ph.D., et al.*

**172 Predictores neurales del inicio del consumo de alcohol durante la adolescencia**

*Lindsay M. Squeglia, Ph.D., et al.* AUDIO

**COMUNICADOS Y ACTUALIZACIONES**

**CARTAS AL EDITOR**

**186 Tricotilomanía y trastorno bipolar**

*Verinder Sharma, M.B.B.S., Christine Baczynski, M.P.H.*

**186 Refinando los enfoques de tratamiento en la tricotilomanía comórbida y el trastorno bipolar: Respuesta a Sharma y Baczynski**

*Jon E. Grant, M.D., M.P.H.*

**187 Confusión familiar de la asociación entre el hábito de fumar de la madre durante el embarazo y la esquizofrenia**

*Sandra M. Meier, Ph.D., et al.*

**188 Importancia de la selección de datos en el estudio de la asociación entre el hábito de fumar de la madre durante el embarazo y la esquizofrenia: Respuesta a Meier et al.**

*Solja Niemelä, M.D., Ph.D., et al.*

**RESEÑAS BIBLIOGRÁFICAS**

**189 The Taliban's Virtual Emirate: The Culture and Psychology of an Online Militant Community [El emirato virtual del talibán: La cultura y psicología de una comunidad militante en línea]**

*Najat Khalifa, D.M., M.R.C.Psych.*

**OTROS TEMAS DE INTERÉS**

**185 Nota del Editor**

**190 [Correction]**

**191 Educación Médica Continuada**

**Cubierta:** [Misty sunrise over Westleton Heath, East Anglia. Kirkbride and colleagues (p. 143) use longitudinal data from this diverse, mixed rural and urban setting in the East of England to define aspects of risk for psychosis in approximately 700 new-onset cases. (© Richard Bowden/ Shutterstock)]

Article content that addresses **Core Competencies**, defined by the Accreditation Council of Graduate Medical Education and the American Board of Medical Specialties, is indicated by the following symbols:

-  Professionalism
-  Patient Care and Procedural Skills
-  Medical Knowledge
-  Practice-Based Learning and Improvement
-  Interpersonal and Communication Skills
-  Systems-Based Practice.

More information is available at [www.abms.org/maintenance\\_of\\_certification/MOC\\_competencies.aspx](http://www.abms.org/maintenance_of_certification/MOC_competencies.aspx)

**La Tabla de Contenidos y resúmenes de Este Número Está Disponible en Español**

*(This issue's Table of Contents and abstracts are available in Spanish)*

Translation presented in collaboration with the Office of Global Health, Rutgers-Robert Wood Johnson Medical School

Support for this effort provided by ACTA Colombia.

**Translation courtesy of**

**Sergi Casals, M.A.**, Garuna, Medellín, Colombia ([www.garunaeditors.com](http://www.garunaeditors.com))

**Carlos Lopez Jaramillo, M.D.**, Universidad de Antioquia, Medellín, Colombia

**Javier I. Escobar, M.D., M.Sc.**, Rutgers-Robert Wood Johnson Medical School

**AUDIO** Highlighted in AJP Audio, a downloadable .mp3 file available at [ajp.psychiatryonline.org](http://ajp.psychiatryonline.org)

**EMC** A course covering the content of this article is available online for paid subscribers to the AJP CME Course program

**EDITORIAL** Discussed in one of the issue's editorials

**GUÍAS CLÍNICAS** Clinical Guidance provided on the English table of contents

**VIDEO** Highlighted online by Deputy Editor Daniel S. Pine, M.D.

## Kahlbaum, Hecker y Kraepelin y la transición de complejos de síntomas psiquiátricos a formas empíricas de la enfermedad

Kenneth S. Kendler, M.D., Eric J. Engstrom, Ph.D.

La nosología de los principales trastornos psiquiátricos desarrollada por Emil Kraepelin en la década de 1890 ha contribuido de manera considerable a darle forma a la psiquiatría. Sus teorías, sin embargo, no surgieron *de novo*, y estuvieron muy influenciadas por las de Karl Kahlbaum y Ewald Hecker. Desde los años 1860-1880 estos autores articularon un cambio de paradigma en la conceptualización del diagnóstico psiquiátrico, que pasaría de síndromes basados en síntomas, populares desde finales del siglo XVIII, a entidades de proto-enfermedades. Este esfuerzo estuvo influenciado por desarrollos paralelos en medicina general, especialmente el surgimiento de las teorías bacterianas de la enfermedad, en las que diferentes síndromes tenían síntomas, cursos y etiologías claramente definidos. El pensamiento de estos autores se configuró particularmente a partir de la mejor comprensión de la parésia general asociada a la locura. Efectivamente, este trastorno, con un curso y unos síntomas característicos claramente definidos, fue paradigmático para ellos. Su esperanza era que una progresión similar de la comprensión médica evolucionaría para los demás síndromes psiquiátricos

principales. Su modo de pensar y la conexión con la nosología de Kraepelin se ilustran a través de una lectura detallada de sus ensayos sobre hebefrenia, catatonía y locura cíclica. Kahlbaum, Hecker y Kraepelin compartieron tanto un compromiso con una agenda de investigación clínica para la psiquiatría (para utilizar métodos de evaluación y seguimiento clínicos que ayudaran a definir las formas de la enfermedad) como un escepticismo de la investigación psiquiátrica hacia el paradigma neuropatológico basado en el cerebro que en ese momento dominaba en la mayoría de centros europeos. Entender los orígenes históricos de nuestros conceptos diagnósticos clave puede ayudarnos a evaluar sus fortalezas y limitaciones. Queda por determinar si este «paradigma Kahlbaum-Hecker-Kraepelin»—que define trastornos en base a síntomas y cursos claramente definidos—producirá síndromes psiquiátricos de suficiente homogeneidad para revelar sus secretos etiológicos.

(*Am J Psychiatry* 2017; 174:102–109)

## Representación de los errores de predicción en individuos con trastorno de ansiedad generalizada durante la evitación pasiva

Stuart F. White, Ph.D., Marilla Geraci, R.N., Elizabeth Lewis, B.S., Joseph Leshin, B.S., Cindy Teng, B.S., Bruno Averbeck, Ph.D., Harma Meffert, Ph.D., Monique Ernst, M.D., Ph.D., James R. Blair, Ph.D., Christian Grillon, Ph.D., Karina S. Blair, Ph.D.

**Objetivo:** Se han reportado déficits en la toma de decisiones basada en el refuerzo en el trastorno de ansiedad generalizada. Sin embargo, la fisiopatología de estos déficits es prácticamente desconocida; los estudios publicados han examinado en su mayor parte adolescentes, y sigue sin determinarse la integridad de los procesos funcionales básicos subyacentes a la toma de decisiones. En particular, no está claro si la representación de los errores de predicción (EP) de refuerzo (la diferencia entre el refuerzo recibido y el esperado) está alterada en el trastorno de ansiedad generalizada. Este estudio examina estos aspectos en adultos con el trastorno.

**Método:** Cuarenta y seis individuos no medicados con trastorno de ansiedad generalizada y 32 sujetos sanos de comparación, pareados por CI, género y edad, realizaron una tarea de evitación pasiva mientras se les hacía IRM funcional. Se realizaron análisis de los datos con un enfoque de modelación computacional.

**Resultados:** En lo concerniente al comportamiento, los individuos con trastorno de ansiedad generalizada mostraron un déficit en la toma de decisiones basada en el refuerzo. Los resultados de las imágenes revelaron que durante la re-

troalimentación, los individuos con trastorno de ansiedad generalizada, en comparación con los sujetos sanos, mostraron una correlación reducida entre los EP y la actividad en la corteza prefrontal ventromedial, el estriado ventral y otras estructuras implicadas en la toma de decisiones. Además, los individuos con trastorno de ansiedad generalizada, en comparación con los participantes sanos, mostraron una correlación reducida entre los EP de castigo, pero no los EP de recompensa, y la actividad en el núcleo/putamen lenticiforme derecho e izquierdo.

**Conclusiones:** Este es el primer estudio en identificar déficits computacionales durante la toma de decisiones en el trastorno de ansiedad generalizada. La señalización de los EP está significativamente alterada en los individuos con el trastorno y puede ser la causa de sus déficits en la toma de decisiones y de su excesiva preocupación acerca de los problemas rutinarios, alterando la actualización en línea («reality check» o verificación de la realidad) de la actual relación entre los valores esperados de las opciones actuales de respuesta y las recompensas y castigos que en realidad se reciben.

(*Am J Psychiatry* 2017; 174:110–117)

## Imágenes de la activación microglial en el primer episodio de psicosis no tratada: Un estudio con PET utilizando [<sup>18</sup>F]FEPPA

Sina Hafizi, M.D., Huai-Hsuan Tseng, M.D., Ph.D., Naren Rao, M.D., Thiviya Selvanathan, M.D., Miran Kenk, Ph.D., Richard P. Bazinet, Ph.D., Ivonne Suridjan, Ph.D., Alan A. Wilson, Ph.D., Jeffrey H. Meyer, M.D., Ph.D., Gary Remington, M.D., Ph.D., Sylvain Houle, M.D., Ph.D., Pablo M. Rusjan, Ph.D., Romina Mizrahi, M.D., Ph.D.

**Objetivo:** La neuroinflamación y las respuestas inmunes anormales están cada vez más implicadas en la fisiopatología de la esquizofrenia. Los estudios previos con tomografía por emisión de positrones (PET) de la proteína translocadora 18 kD (TSPO) han sido limitados por el ligamiento no específico del ligando de primera generación, escáneres de baja resolución, tamaños de muestra pequeños y pacientes psicóticos que tomaban antipsicóticos o que no estaban en el primer episodio de la enfermedad. El estudio actual utiliza el radioligando PET [<sup>18</sup>F]FEPPA del gen TSPO de segunda generación para evaluar si la activación microglial es elevada en la corteza prefrontal dorsolateral y en el hipocampo de pacientes no tratados en el primer episodio psicótico.

**Método:** Los sujetos fueron 19 pacientes con primer episodio de psicosis no tratados (14 de los cuales nunca habían tomado antipsicóticos) y 20 voluntarios sanos, a los que se estudió por medio de PET [<sup>18</sup>F]FEPPA (escanografía por emisión de positrones) y resonancia magnética. Se analizaron datos dinámicos PET utilizando el modelo validado de com-

partimiento de 2 tejidos con la función input de plasma arterial, siendo el volumen total de distribución ( $V_T$ ) la medida de resultado. Todos los análisis se corrigieron para el polimorfismo rs6971 del gen TSPO (que está implicado en afinidad de ligamiento diferencial).

**Resultados:** No se observaron diferencias significativas entre pacientes y voluntarios sanos en activación microglial, según lo indexa [<sup>18</sup>F]FEPPA  $V_T$ , ni en la corteza prefrontal dorsolateral ni en el hipocampo. No hubo correlaciones significativas entre [<sup>18</sup>F]FEPPA  $V_T$  y duración de la enfermedad, presentación clínica ni medidas neuropsicológicas después de ajustar para múltiples pruebas.

**Conclusiones:** La falta de diferencias significativas en [<sup>18</sup>F]FEPPA  $V_T$  entre grupos sugiere que la activación microglial no está presente en el primer episodio de psicosis.

(*Am J Psychiatry* 2017; 174:118–124)

## Substratos neurales del miedo condicionado sobregeneralizado en TEPT

Antonia N. Kaczurkin, Ph.D., Philip C. Burton, Ph.D., Shai M. Chazin, B.S., Adrienne B. Manbeck, Tori Espensen-Sturges, B.A., Samuel E. Cooper, B.A., Scott R. Sponheim, Ph.D., Shmuel Lissek, Ph.D.

**Objetivo:** La generalización aumentada del miedo a partir de un estímulo condicionado reforzado de forma aversiva, (EC+, una señal de peligro condicionado) a estímulos similares está ampliamente aceptada como un marcador patológico del trastorno por estrés postraumático (TEPT). Efectivamente, una respuesta de angustia a estímulos benignos que se asemejan a aspectos del trauma es un rasgo central del trastorno. Hasta la fecha, el vínculo entre la sobregeneralización del miedo condicionado y el TEPT se deriva en gran medida de observaciones clínicas, y el trabajo empírico sobre este tema es limitado. Este representa el primer esfuerzo para examinar índices comportamentales y cerebrales del miedo condicionado generalizado en TEPT utilizando métodos sistemáticos desarrollados en animales, conocidos como gradientes de generalización: la disminución gradual de las respuestas condicionadas a medida que el estímulo presentado se va diferenciando gradualmente del EC+.

**Método:** Los gradientes de la generalización del miedo condicionado fueron evaluados utilizando IRM funcional y medidas comportamentales en veteranos de combate estadounidenses que prestaron servicio en Iraq o Afganistán y tenían TEPT (N=26), TEPT subumbral (N=19) o no tenían TEPT (llamados sujetos control) (N=17). Los estímulos presentados incluyeron anillos de tamaño graduado, con tamaños extremos que servían como EC+ (apareado con shock) y como un estímulo condicionado no reforzado (EC-, una señal de se-

guridad condicionada), y con tamaños intermedios que formaban un continuo de similitud entre EC+ y EC-. Los gradientes de generalización se evaluaron como pendientes de respuesta desde EC+ a través de tamaños de anillo intermedios, hasta EC-, con las pendientes menos pronunciadas indicando una mayor generalización.

**Resultados:** En comparación con los sujetos control de trauma, los pacientes con TEPT mostraron mayor generalización condicionada, tal como evidenciaron gradientes de generalización menos pronunciados tanto en evaluaciones del riesgo comportamental como en respuestas cerebrales en la ínsula izquierda y anterior, el hipocampo ventral izquierdo, la corteza prefrontal dorsolateral y dorsomedial y el núcleo caudado. La severidad de los síntomas de TEPT en los tres grupos de estudio estuvo correlacionada de forma positiva con los niveles de generalización en dos de estos sitios (*loci*): la ínsula anterior derecha y el hipocampo ventral izquierdo.

**Conclusiones:** Los resultados apuntan hacia evidencia de marcadores basados en el cerebro de condicionamiento sobregeneralizado del miedo, relacionado con el TEPT. Estos hallazgos ofrecen una mejor comprensión de un síntoma central, si bien todavía no suficientemente estudiado, de la psicopatología relacionada con los traumas.

(*Am J Psychiatry* 2017; 174:125–134)

# La expectativa de los pacientes como mediador de los efectos placebo en ensayos clínicos de antidepresivos

Bret R. Rutherford, M.D., Melanie M. Wall, Ph.D., Patrick J. Brown, Ph.D., Tse-Hwei Choo, B.A., Tor D. Wager, Ph.D., Bradley S. Peterson, M.D., Sarah Chung, B.A., Irving Kirsch, Ph.D., Steven P. Roose, M.D.

**Objetivo:** Las causas de los efectos placebo en los ensayos de antidepresivos se han inferido a partir de estudios observacionales y meta-análisis, pero sus mecanismos no se han establecido directamente. El objetivo de este estudio fue examinar en un ensayo prospectivo, aleatorio y controlado, si la expectativa de los pacientes es un mediador de los efectos placebo en los estudios de antidepresivos.

**Método:** Pacientes ambulatorios adultos con trastorno depresivo mayor fueron asignados de forma aleatoria a recibir tratamiento abierto con citalopram o controlado con placebo. Después de medir la expectativa antes y después de la aleatorización, los participantes recibieron el tratamiento con citalopram o placebo por 8 semanas. Pruebas T de muestras independientes determinaron si la expectativa de los pacientes era diferente entre el grupo abierto y el controlado con placebo, y modelos de efectos mixtos evaluaron los efectos de grupo con las puntuaciones de la Escala de Evaluación de Depresión de Hamilton (HAM-D) a lo largo del tiempo a la par que controlaban la asignación de tratamiento. Finalmente, con análisis de mediación se miró si las diferencias entre grupos en cuanto a la expectativa de los pacientes mediaron el efecto de grupo en las puntuaciones de la escala HAM-D.

**Resultados:** Las puntuaciones de expectativa después de la aleatorización fueron significativamente más altas en el grupo abierto (media=12,1 [DE=2,1]) en comparación con las del grupo controlado con placebo (media=11,0 [DE=2,0]). El modelaje de efectos mixtos reveló una interacción significativa entre semana de tratamiento y grupo, indicando que las puntuaciones en la escala HAM-D para los participantes tratados con citalopram disminuyó a un ritmo más rápido en el grupo abierto en comparación con el grupo controlado con placebo. Las expectativas de los pacientes después de la aleatorización mediaron parcialmente los efectos de grupo en la semana 8 en la escala HAM-D.

**Conclusiones:** La expectativa de los pacientes es un mediador significativo de los efectos placebo en ensayos de antidepresivos. Las intervenciones relacionadas con la expectativa deberían ser investigadas como un medio de controlar las respuestas al placebo en los ensayos clínicos de antidepresivos y de mejorar el resultado de los pacientes en el tratamiento clínico.

(*Am J Psychiatry* 2017; 174:135–142)

# La epidemiología del primer episodio de psicosis en la intervención temprana en servicios de psicosis: Hallazgos del estudio de Epidemiología Social de las Psicosis en East Anglia [SEPEA]

James B. Kirkbride, Ph.D., Yasir Hameed, M.R.C.Psych., Gayatri Ankireddypalli, M.D., M.R.C.Psych., Konstantinos Ioannidis, M.R.C.Psych., Carolyn M. Crane, M.Sc., Mukhtar Nasir, M.R.C.Psych., Nikolett Kabacs, M.D., Antonio Metastasio, M.D., M.R.C.Psych., Oliver Jenkins, M.R.C.Psych., Ashkan Espandian, M.D., Styliani Spyridi, Ph.D., M.R.C.Psych., Danica Ralevic, M.R.C.Psych., Suneetha Siddabattuni, M.R.C.Psych., Ben Walden, M.R.C.Psych., Adewale Adeoye, M.P.H., M.B.B.S., Jesus Perez, M.D., Ph.D., Peter B. Jones, Ph.D., FMedSci.

**Objetivo:** Pocos estudios han caracterizado la epidemiología del primer episodio de las psicosis en entornos rurales o urbanos desde la introducción de los servicios de intervención temprana en psicosis. Para hacerlo, los autores realizaron un estudio de cohorte naturalista en Inglaterra, donde dichos servicios están bien establecidos.

**Método:** Todos los casos nuevos de primer episodio de psicosis, entre 16 y 35 años, que se presentaron a los servicios de intervención temprana en psicosis en el este de Inglaterra se identificaron durante un seguimiento de 2 millones persona-años. La presencia del trastorno psicótico F10-33, del CIE-10, se confirmó utilizando OPCRIT [criterios operacionales para la enfermedad psicótica]. Las razones de las tasas de incidencia se estimaron siguiendo la regresión multivariable de Poisson, ajustando por edad, sexo, grupo étnico, estatus socio-económico, nivel de privación del barrio y densidad de población.

**Resultados:** De 1.005 remisiones, 687 participantes (68,4%) cumplieron con los criterios epidemiológicos y diagnósticos para primer episodio psicótico (34,0 casos nuevos por 100.000 años-persona; IC 95%= 31,5-36,6). La edad mediana en la remisión fue similar para hombres (22,5 años; rango

intercuartil: 19,5-26,7) y mujeres (23,4 años; rango intercuartil: 19,5-29,1); las tasas de incidencia fueron más altas para hombres y mujeres antes de los 20 años de edad. Las tasas aumentaron para los grupos étnicos minoritarios (razón de tasa de incidencia: 1,4; IC 95%=1,1-1,6), igual que con el estatus socio-económico (razón de tasa de incidencia: 1,3; IC 95%=1,2-1,4) y en barrios más urbanos (razón de tasa de incidencia: 1,4; IC 95%=1,0-1,8) y desfavorecidos (razón de incidencia: 2,1; IC 95%=1,3-3,3), después del ajuste para las variables de confusión.

**Conclusiones:** Existe una marcada variación de la incidencia de la psicosis, alcanzando el punto máximo antes de los 20 años de edad, en poblaciones que cuentan con servicios de intervención temprana para la psicosis. Las tasas de exceso fueron restringidas a las comunidades urbanas y desfavorecidas, lo que sugiere que puede ser necesario un umbral de adversidad socio-ambiental para aumentar la incidencia. Esta robusta epidemiología puede informar el desarrollo de servicio en varios entornos acerca de la posible necesidad a nivel de la población.

(*Am J Psychiatry* 2017; 174:143-153)



## Predicción del comportamiento suicida a partir de historias clínicas electrónicas longitudinales

Yuval Barak-Corren, M.S., Víctor M. Castro, M.S., Solomon Javitt, M.D., Alison G. Hoffnagle, M.S., Yael Dai, B.A., Roy H. Perlis, M.D., M.Sc., Matthew K. Nock, Ph.D., Jordan W. Smoller, M.D., Sc.D., Ben Y. Reis, Ph.D.

**Objetivo:** El propósito de este artículo fue determinar si los datos históricos longitudinales disponibles en los sistemas de historias clínicas electrónicas (HCE) pueden ser utilizados para predecir el futuro riesgo de comportamiento suicida de los pacientes.

**Método:** Se desarrollaron modelos bayesianos utilizando un enfoque de cohorte retrospectivo. Se utilizaron datos de HCE de una base de datos de atención sanitaria de 15 años (1998–2012) de visitas de pacientes internos y ambulatorios para predecir futuro comportamiento suicida documentado (es decir, intento de suicidio o muerte). Se incluyeron los pacientes con tres o más visitas (N=1.728.549). Se derivó la definición de caso de comportamiento suicida del CIE-9 por revisión por consenso clínico de 2.700 relatos en HCE (de 520 pacientes), complementados con certificados estatales de defunción. El desempeño del modelo fue evaluado retrospectivamente utilizando una serie independiente de pruebas.

**Resultados:** En la población de estudio, 1,2% (N=20.246) cumplieron con la definición de comportamiento suicida. El modelo logró una predicción sensible (sensibilidad de 33%–

45%), específica (especificidad e 90%–95%) y temprana (3–4 años antes en promedio) del futuro comportamiento suicida de los pacientes. Los predictores más fuertes identificados por el modelo incluyeron factores de riesgo tanto conocidos (por ejemplo, abuso de sustancias y trastornos psiquiátricos) como menos convencionales (p.ej, ciertas lesiones y enfermedades crónicas), lo que indica que un enfoque que se guíe por los datos puede llegar a perfiles de riesgo más detallados.

**Conclusiones:** Los datos de HCE longitudinales, normalmente disponibles en entornos clínicos, pueden ser útiles para predecir futuro riesgo de comportamiento suicida. Este enfoque de modelaje podría servir como un sistema de alerta temprana para ayudar a los clínicos a identificar pacientes de alto riesgo para tamizajes adicionales. Analizando la amplitud fenotípica completa del riesgo de HCE computarizadas los enfoques de tamizaje pueden mejorar la predicción más allá de lo que es factible para los clínicos individuales.

(*Am J Psychiatry* 2017; 174:154–162)

## Expresión alterada de los genes de la vía de señalización del complejo ARP2/3 en las células piramidales de la capa prefrontal 3 en esquizofrenia

Dibyadeep Datta, Ph.D., Dominique Arion, Ph.D., Kaitlyn M. Roman, B.S., David W. Volk, M.D., Ph.D., David A. Lewis, M.D.

**Objetivo:** La baja densidad de espinas dendríticas en las células piramidales de la capa 3 en la corteza prefrontal dorsolateral (CPF DL) parece contribuir a la disfunción cognitiva en esquizofrenia, mientras que la psicosis se relaciona con una excesiva liberación de dopamina en el cuerpo estriado. Estos hallazgos pueden estar relacionados por medio de proyecciones excitatorias de la CPF DL hasta el mesencéfalo ventral, de manera que la ubicación de las células de dopamina se proyecta al cuerpo estriado. En consonancia con esta hipótesis, la eliminación del complejo de proteínas-2/3 relacionadas con la actina (ARP2/3, por sus siglas en inglés), que regula el citoesqueleto de actina que soporta las espinas dendríticas, produjo pérdida de espinas en las células piramidales corticales e hiperdopaminergia estriatal en ratones. Los autores se propusieron determinar si el complejo ARP2/3 está alterado en la esquizofrenia.

**Método:** En pares de sujetos con esquizofrenia y de comparación, se evaluaron los niveles de transcripción de la vía de señalización del complejo ARP2/3 en las células piramidales de las capas 3 y 5 de la CPF DL microdisecadas mediante láser

y las interneuronas parvalbúmica de la capa 3, y en total la sustancia gris de la CPF DL.

**Resultados:** Los niveles de transcripción de las sub-unidades del complejo ARP2/3 y de los factores de promoción nuclear que regulan el complejo ARP2/3 fueron significativamente inferiores en las células piramidales de las capas 3 y 5 en esquizofrenia. En contraste, estas transcripciones no se alteraron, o sólo cambiaron de forma modesta, en las interneuronas parvalbúmina y la sustancia gris de la CPF DL.

**Conclusiones:** La baja regulación de la vía de señalización del complejo ARP2/3, una vía final común para múltiples cascadas de señalización que regulan el citoesqueleto de actina, comprometerían la estabilidad estructural de las espinas, conduciendo a la pérdida de las mismas. En sintonía con los hallazgos sobre la eliminación del complejo ARP2/3 en ratones, estos hallazgos apoyan la idea que los déficits de espinas en la CPF DL pueden contribuir a la hiperdopaminergia subcortical en esquizofrenia.

(*Am J Psychiatry* 2017; 174:163–171)

## Predictores neurales del inicio del consumo de alcohol durante la adolescencia

Lindsay M. Squeglia, Ph.D., Tali M. Ball, Ph.D., Joanna Jacobus, Ph.D., Ty Brumback, Ph.D., Benjamin S. McKenna, Ph.D., Tam T. Nguyen-Louie, M.S., Scott F. Sorg, Ph.D., Martin P. Paulus, M.D., Susan F. Tapert, Ph.D.

**Objetivo:** Es ampliamente reconocido que el consumo de alcohol a una edad temprana es uno de los principales problemas de salud y social para los adolescentes en los Estados Unidos. Poder identificar a adolescentes en riesgo antes de que inicien el consumo excesivo de alcohol podría tener implicaciones importantes tanto clínicas como de salud pública; sin embargo, pocas investigaciones han explorado los precursores individuales del consumo de sustancias en los adolescentes. Esta investigación prospectiva utilizó aprendizaje automático con datos demográficos, neurocognitivos y de neuroimágenes en adolescentes que nunca habían consumido sustancias para identificar los predictores del inicio del consumo de alcohol a los 18 años.

**Método:** Los participantes (N=137) fueron adolescentes sanos que nunca habían consumido sustancias (edad entre 12 y 14 años) a los que se les hicieron pruebas neuropsicológicas y resonancia magnética funcional y estructural (IRMf e IRMe), y posteriormente seguimiento anual. A los 18 años, 70 jóvenes (51%) empezaron a consumir alcohol de manera moderada a excesiva y 67 siguieron sin consumir. Modelos de clasificación *random forest* identificaron los predictores más importantes de consumo de alcohol a partir de un con-

junto grande de variables demográficos, neuropsicológicos, de IRMe y de IRMf.

**Resultados:** Los modelos *random forest* identificaron 34 predictores que contribuyen al consumo de alcohol a los 18 años, incluyendo varios factores demográficos y comportamentales (ser hombre, estatus socio-económico alto, citas amorosas a temprana edad, comportamientos más externalizadores, expectativas positivas del alcohol), peor funcionamiento ejecutivo, y cortezas más delgadas y menor activación cerebral en regiones cerebrales distribuidas de manera difusa.

**Conclusiones:** La incorporación de una combinación de datos demográficos, comportamentales, neuropsicológicos y de neuroimágenes puede ser la mejor estrategia para identificar jóvenes en riesgo de iniciar el consumo de alcohol durante la adolescencia. Los factores de riesgo identificados serán útiles para los esfuerzos de prevención del alcohol y en la investigación para abordar los mecanismos cerebrales que pueden contribuir al hábito de beber a una edad temprana.

(*Am J Psychiatry* 2017; 174:172–185)
